# Supplementary material for: New Insights into How Yersinia pestis Adapts to Its Mammalian Host during Bubonic Plague
Source: PLOS journal article supplement (doi:10.1371/journal.ppat.1004029), 2014-03-27
Supplement: S10 (10.1371/journal.ppat.1004029.s010) [file journal.ppat.1004029.s010]

**Table S5.** Role of metal acquisition systems in plague

| METAL ACQUISITION SYSTEMS |                  | MUTANT LACKING               |                                       | DIFFERENTIAL<br>EXPRESSION<br>IN VIVO * | VIRULENCE DATA OBTAINED USING |                |                                |                         | ROLE IN<br>VIRULENCE* |    |
|---------------------------|------------------|------------------------------|---------------------------------------|-----------------------------------------|-------------------------------|----------------|--------------------------------|-------------------------|-----------------------|----|
|                           |                  |                              |                                       |                                         | PER POOL MUTANTS <sup>†</sup> |                | INDIVIDUAL MUTANT <sup>‡</sup> |                         |                       |    |
|                           |                  | ORF(s)                       | GENE(s)                               |                                         | ARCI ± SE IN                  |                | SURVIVAL<br>(mutant vs WT)     |                         |                       |    |
|                           |                  |                              |                                       |                                         | LYMPH NODE                    | SPLEEN         | PERCENT                        | MEDIAN<br>(in days)     |                       |    |
| Iron                      | Siderophores     | YPO0989-YPO0994 <sup>Φ</sup> | <i>iucABCD iutA</i>                   | +                                       | 20.2 ± 13                     | 10.1 ± 10      | 0 vs 0                         | 4 vs 4                  | No                    |    |
|                           |                  | YPO1753                      | <i>fcuA</i>                           | +                                       | 31.2 ± 13                     | 26.9 ± 13      | Not determined                 |                         | No                    |    |
|                           |                  | YPO1528-YPO1538              | <i>ysuFJIHGDCBARED</i>                | +                                       | 50.4 ± 15                     | 47.4 ± 14      | Not determined                 |                         | No                    |    |
|                           |                  | YPO0955-YPO0956              | -                                     | +                                       | 63.2 ± 14                     | 53.7 ± 16      | Not determined                 |                         | No                    |    |
|                           |                  | YPO1008-YPO1012 <sup>a</sup> | <i>-ynp1 ynp2</i>                     | +                                       | Not determined                |                | 12.5 vs 12.5                   | 5 vs 4                  | No                    |    |
|                           |                  | YPO3340 <sup>a</sup>         | -                                     | +                                       | Not determined                |                | 0 vs 0                         | 4 vs 4                  | No                    |    |
|                           |                  | YPO1906-YPO1916              | <i>fyuA ybtETU irp1 irp2 ybtAPQXS</i> | +                                       | Not determined                |                | Previously studied [10]        |                         | Yes                   |    |
|                           |                  | YPO0770-YPO0777              | <i>ynp3 to ynp11</i>                  | ↔                                       | Not determined                |                | Not determined                 |                         | To be tested          |    |
|                           | ABC transporters | YPO2958-YPO2960              | <i>yfuABC</i>                         | +                                       | 23.0 ± 13                     | 17.9 ± 10      | Previously studied [11]        |                         | No                    |    |
|                           |                  | YPO4022-YPO4025              | <i>fitABCD</i>                        | +                                       | 34.4 ± 14                     | 39.2 ± 14      | Not determined                 |                         | No                    |    |
|                           |                  | YPO1343-YPO1345              | <i>fiuABC</i>                         | +                                       | 35.6 ± 15                     | 27.3 ± 14      | Not determined                 |                         | No                    |    |
|                           |                  | YPO1310-YPO1313              | <i>yiuvABCR</i>                       | +                                       | Not determined                |                | 0 vs 12.5                      | 4 vs 4                  | No                    |    |
|                           |                  | YPO2439-YPO2442              | <i>yfeABCD</i>                        | +                                       | Not determined                |                | Previously studied [12]        |                         | Yes                   |    |
|                           |                  | YPO3390-YPO3392              | <i>fhuCDB</i>                         | ↔                                       | Not determined                |                | Not determined                 |                         | To be tested          |    |
|                           | Permeases        | YPO1854-YPO1856              | <i>efeUOB</i>                         | +                                       | Not determined                |                | 12.5 vs 12.5                   | 4 vs 4.5                | No                    |    |
|                           |                  | YPO1941-YPO1948              | -                                     | +                                       | Not determined                |                | 0 vs 0                         | 4 vs 4                  | No                    |    |
|                           |                  | Heme uptake                  | YPO0286-YPO0279                       | <i>-hmuRSTUV</i>                        | +                             | Not determined |                                | 0 vs 0                  | 4.5 vs 5.5            | No |
|                           |                  |                              | YPO1951-YPO1954                       | <i>hmsHFRS</i>                          | +                             | 57.4 ± 15      | 37.8 ± 14                      | Previously studied [13] |                       | No |
|                           |                  |                              | YPO3918-YPO3923                       | <i>hasRADEB</i>                         | —                             | Not determined |                                | Previously studied [14] |                       | No |
|                           |                  | Ferrous                      | YPO0131-YPO133                        | <i>feoABC</i>                           | ↔                             | Not determined |                                | Previously studied [15] |                       | No |
| Manganese                 | ABC transporter  | YPO2439-YPO2442              | <i>yfeABCD</i>                        | +                                       | Not determined                |                | Previously studied [12]        |                         | Yes                   |    |
|                           | Permease         | YPO2982                      | <i>mntH</i>                           | +                                       | Not determined                |                | 0 vs 0                         | 4 vs 4                  | No <sup>‡</sup>       |    |
| Zinc                      | ABC transporter  | YPO2439-YPO2442              | <i>yfeABCD</i>                        | +                                       | Not determined                |                | Previously studied [12]        |                         | Yes                   |    |
|                           |                  | YPO2059-YPO2061              | <i>znuBC znuA</i>                     | +                                       | Not determined                |                | 25 vs 0                        | 6.5 vs 6.5              | No <sup>‡</sup>       |    |

<sup>\*</sup>, according to our previous data [16]

<sup>†</sup>, ARCI were determined in groups of 10 rats inoculated with a pool of 5 mutants (with 20 CFU of each mutant)

<sup>‡</sup>, virulence was determined after intradermal inoculation of ~10 CFU. Groups of 8 animals were used

<sup>‡</sup>, confirms recently published work

<sup>Φ</sup>, pseudogene

<sup>\*</sup>, a gene was considered to be necessary ("Yes") or not necessary ("No") for virulence if the survival curve for animals infected with the mutant and the wild-type strain were significantly different (p<0.05) or not significantly different (p>0.05) in a Gehan-Breslow-Wilcoxon test, or because the mutant was outcompeted (ARCI<20) or not outcompeted (ARCI≥20) in the per-pool screening, or because it has been previously studied elsewhere. In the latter case, a reference (Text S1) is provided.
